# Supplementary material
Source: MDPI journal article supplement (https://www.mdpi.com/2311-5637/9/3/223)
Supplement: s1 [file s1]

*Supplementary material*

# Characterization of Sparkling Wine Based on Polyphenolic Profiling by Liquid Chromatography Coupled to Mass Spectrometry

Eleonora Oliva <sup>1,2</sup>, Aina Mir-Cerdà <sup>1,3</sup>, Manuel Sergi <sup>4</sup>, Sònia Sentellas <sup>1,3,5</sup> and Javier Saurina <sup>1,3,\*</sup>

<sup>1</sup> Department of Chemical Engineering and Analytical Chemistry, Universitat de Barcelona, E08028 Barcelona, Spain

<sup>2</sup> Faculty of Bioscience and Technology for Food, Agriculture and Environment, 64100 Teramo, Italy

<sup>3</sup> Research Institute in Food Nutrition and Food Safety, Universitat de Barcelona, Recinte Torribera, E08921 Santa Coloma de Gramenet, Spain

<sup>4</sup> Chemistry Department, University La Sapienza, 00185 Rome, Italy

<sup>5</sup> Serra Hünter Fellow, Generalitat de Catalunya, E08007 Barcelona, Spain

\* Correspondence: Correspondence: xavi.saurina@ub.edu

**Table S1.** Chemical structures of principal families of phenolic compounds tentatively present in white wines.

| Family         | Subfamily                 | General structure                                                                   | Substitutions                                                                          |
|----------------|---------------------------|-------------------------------------------------------------------------------------|----------------------------------------------------------------------------------------|
| Phenolic acids | Benzoic acids             | 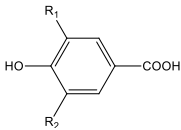   | R1: H, OH, OCH <sub>3</sub><br>R2: H, OH, OCH <sub>3</sub>                             |
|                | Cinnamic acids            |    | R1: H, OH, OCH <sub>3</sub><br>R2: H, OCH <sub>3</sub>                                 |
| Flavonoids     | Flavones<br>Flavonols     |    | R1: H, OH<br>R2: H, OH<br>R3: OH<br>R4: H, OH<br>R5: H, OH                             |
|                | Flavonones<br>Flavononols |   | R1: H, OH<br>R2: OH<br>R3: H, OH<br>R4: H, OH<br>R5: OH, OCH <sub>3</sub><br>R6: H, OH |
|                | Catechins                 |  | R1 to R3: OH<br>R4: H, OH<br>R5: OH<br>R6: H, OH                                       |
| Stilbenes      |                           |  | R1 to R4: H, OH, OCH <sub>3</sub><br>R5: H, OH                                         |

**Table S2.** MRM transitions for the detection of polyphenols by LC-ESI-MS/MS.

| Polyphenol                   | Parent ion<br>( <i>m/z</i> ) | Daughter<br>ion<br>( <i>m/z</i> ) | DP (V) | CE (V) | CXP (V) |
|------------------------------|------------------------------|-----------------------------------|--------|--------|---------|
| Gallic acid                  | 169.0                        | 124.9                             | −40    | −22    | −19     |
| Caffeic acid                 | 178.9                        | 134.8                             | −45    | −20    | −1      |
| Quercetin                    | 300.9                        | 150.8                             | −80    | −32    | −1      |
| Kaempferol                   | 285.1                        | 117.0                             | −91    | −63    | −3      |
| Resveratrol                  | 226.8                        | 143.3                             | −70    | −34    | −1      |
| Ferulic acid                 | 192.6                        | 134.3                             | −30    | −22    | −1      |
| Vanillic acid                | 166.9                        | 151.8                             | −65    | −20    | −1      |
| Ethyl gallate                | 197.2                        | 123.8                             | −60    | −34    | −3      |
| Catechin                     | 289.1                        | 109.2                             | −110   | −42    | −19     |
| Epicatechin                  | 288.7                        | 124.9                             | −85    | −33    | −7      |
| p-Coumaric acid              | 163.0                        | 119.3                             | −60    | −18    | −1      |
| Rutin                        | 609.2                        | 299.6                             | −95    | −48    | −23     |
| Myricetin                    | 316.9                        | 150.8                             | −95    | −40    | −9      |
| Syringic acid                | 196.9                        | 120.9                             | −40    | −26    | −9      |
| Astilbin                     | 449.1                        | 285.0                             | −100   | −32    | −1      |
| Trans-coutaric acid          | 295.0                        | 162.9                             | −30    | −20    | −11     |
| Caftaric acid                | 311.1                        | 179.0                             | −50    | −22    | −11     |
| 4-hydroxybenzoic acid        | 136.8                        | 92.9                              | −55    | −18    | −7      |
| Chlorogenic acid             | 352.9                        | 190.6                             | −60    | −20    | −17     |
| 4-Hydroxytyrosol             | 152.9                        | 122.9                             | −7     | −22    | −8      |
| Procyanidin B1               | 577.3                        | 288.9                             | −90    | −10    | −40     |
| Procyanidin B2               | 577.1                        | 407.1                             | −75    | −26    | −21     |
| 2,5-dihydroxybenzoic<br>acid | 152.8                        | 108.0                             | −50    | −18    | −15     |
| 3,4-dihydroxybenzoic<br>acid | 152.9                        | 108.9                             | −70    | −20    | −3      |

DP: declustering potential, CE: collision energy, CXP: collision cell exit potential.

**Table S3.** Concentrations in mg L<sup>-1</sup> of polyphenols in the set of samples analyzed in triplicate. Sample nomenclature: base wine (BW), stabilized wine (SW), sparkling wine (3 months aged, 3M), sparkling wine (7 months aged, 7M), A-type Pinot Noir (PA), B-type Pinot Noir (PB), C-type Pinot Noir (PC), D-type Pinot Noir (PD), A-type Xarel-lo (XA), B-type Xarel-lo (XB), C-type Xarel-lo (XC), and D-type Xarel-lo (XD). .

| Sample | Gallic Acid | Caffeic acid | Vanillic Acid | Ethyl gallate | Astilbin | Caftaric acid | 4-Hydroxybenzoic acid | 2,5-Dihydroxybenzoic acid | 3,4-Dihydroxybenzoic acid | OH-Tyrosol | Ferulic acid | Syringic acid | p-Coumaric acid | Catechin | Epicatechin | Coumaric acid | Procyanidin B1 | Procyanidin B2 |
|--------|-------------|--------------|---------------|---------------|----------|---------------|-----------------------|---------------------------|---------------------------|------------|--------------|---------------|-----------------|----------|-------------|---------------|----------------|----------------|
| 3MPA   | 0.25        | 2.47         | 0.37          | 0.13          | 0.46     | 22.60         | 0.09                  | 0.05                      | 0.11                      | 0.17       | 0.10         | 0.00          | 0.08            | 0.78     | 0.25        | 0.97          | 0.68           | 0.56           |
| 3MPA   | 0.26        | 2.31         | 0.36          | 0.12          | 0.49     | 23.10         | 0.08                  | 0.05                      | 0.11                      | 0.18       | 0.10         | 0.01          | 0.08            | 0.71     | 0.24        | 1.04          | 0.68           | 0.56           |
| 3MPA   | 0.17        | 2.40         | 0.37          | 0.12          | 0.46     | 22.90         | 0.09                  | 0.05                      | 0.11                      | 0.18       | 0.12         | 0.00          | 0.07            | 0.74     | 0.25        | 1.02          | 0.67           | 0.55           |
| 7MPA   | 0.26        | 2.45         | 0.30          | 0.12          | 0.43     | 21.30         | 0.07                  | 0.21                      | 0.13                      | 0.19       | 0.07         | 0.20          | 0.03            | 0.26     | 0.20        | 0.29          | 0.00           | 0.00           |
| 7MPA   | 0.27        | 2.46         | 0.28          | 0.13          | 0.47     | 21.60         | 0.07                  | 0.22                      | 0.13                      | 0.19       | 0.07         | 0.18          | 0.04            | 0.25     | 0.18        | 0.28          | 0.00           | 0.00           |
| 7MPA   | 0.26        | 2.30         | 0.29          | 0.13          | 0.47     | 21.20         | 0.07                  | 0.21                      | 0.13                      | 0.19       | 0.06         | 0.18          | 0.04            | 0.26     | 0.18        | 0.30          | 0.00           | 0.00           |
| SWPA   | 0.25        | 2.74         | 0.37          | 0.14          | 0.51     | 27.50         | 0.07                  | 0.12                      | 0.10                      | 0.28       | 0.19         | 0.01          | 0.39            | 0.66     | 0.22        | 0.87          | 0.60           | 0.55           |
| SWPA   | 0.25        | 2.65         | 0.36          | 0.13          | 0.51     | 27.90         | 0.07                  | 0.12                      | 0.12                      | 0.28       | 0.18         | 0.01          | 0.38            | 0.62     | 0.22        | 0.90          | 0.60           | 0.54           |
| SWPA   | 0.25        | 2.62         | 0.35          | 0.14          | 0.52     | 27.30         | 0.08                  | 0.10                      | 0.10                      | 0.27       | 0.20         | 0.01          | 0.36            | 0.62     | 0.23        | 0.83          | 0.58           | 0.54           |
| BWPA   | 0.13        | 1.48         | 0.24          | 0.08          | 0.44     | 23.80         | 0.02                  | 1.01                      | 0.40                      | 0.75       | 0.31         | 0.06          | 0.76            | 1.24     | 0.43        | 3.07          | 0.74           | 0.58           |
| BWPA   | 0.13        | 1.53         | 0.27          | 0.08          | 0.44     | 23.60         | 0.03                  | 1.04                      | 0.41                      | 0.73       | 0.30         | 0.06          | 0.71            | 1.09     | 0.38        | 2.71          | 0.75           | 0.57           |
| BWPA   | 0.13        | 1.46         | 0.25          | 0.08          | 0.42     | 24.00         | 0.03                  | 1.00                      | 0.39                      | 0.73       | 0.29         | 0.05          | 0.71            | 1.13     | 0.41        | 2.66          | 0.75           | 0.58           |
| 3MPB   | 0.86        | 0.90         | 0.23          | 0.40          | 1.31     | 10.20         | 0.07                  | 0.25                      | 0.08                      | 0.18       | 0.10         | 0.02          | 0.02            | 0.94     | 0.31        | 1.90          | 0.60           | 0.54           |
| 3MPB   | 0.87        | 0.90         | 0.24          | 0.39          | 1.45     | 9.85          | 0.08                  | 0.25                      | 0.08                      | 0.18       | 0.11         | 0.02          | 0.02            | 0.92     | 0.29        | 1.98          | 0.58           | 0.55           |
| 3MPB   | 0.83        | 0.87         | 0.26          | 0.39          | 1.46     | 9.77          | 0.07                  | 0.25                      | 0.08                      | 0.20       | 0.09         | 0.01          | 0.02            | 0.94     | 0.29        | 1.94          | 0.58           | 0.54           |
| 7MPB   | 0.97        | 1.10         | 0.24          | 0.41          | 1.57     | 10.90         | 0.09                  | 0.05                      | 0.16                      | 0.39       | 0.18         | 0.23          | 0.16            | 0.24     | 0.20        | 0.29          | 0.00           | 0.00           |
| 7MPB   | 0.97        | 1.03         | 0.23          | 0.42          | 1.63     | 10.50         | 0.09                  | 0.05                      | 0.16                      | 0.38       | 0.18         | 0.24          | 0.14            | 0.25     | 0.18        | 0.29          | 0.00           | 0.00           |
| 7MPB   | 0.94        | 0.97         | 0.31          | 0.44          | 1.55     | 11.30         | 0.09                  | 0.05                      | 0.17                      | 0.38       | 0.19         | 0.23          | 0.14            | 0.24     | 0.18        | 0.29          | 0.00           | 0.00           |
| SWPB   | 0.77        | 0.80         | 0.36          | 0.39          | 1.28     | 9.11          | 0.08                  | 0.41                      | 0.15                      | 0.38       | 0.16         | 0.08          | 0.27            | 0.46     | 0.24        | 2.89          | 0.52           | 0.00           |
| SWPB   | 0.77        | 0.79         | 0.34          | 0.39          | 1.35     | 9.34          | 0.08                  | 0.42                      | 0.15                      | 0.38       | 0.16         | 0.08          | 0.26            | 0.45     | 0.23        | 2.75          | 0.52           | 0.00           |
| SWPB   | 0.77        | 0.80         | 0.35          | 0.39          | 1.29     | 9.56          | 0.08                  | 0.42                      | 0.15                      | 0.35       | 0.15         | 0.08          | 0.25            | 0.42     | 0.23        | 2.69          | 0.53           | 0.00           |

|      |      |      |      |      |      |       |      |      |      |      |      |      |      |      |      |      |      |      |
|------|------|------|------|------|------|-------|------|------|------|------|------|------|------|------|------|------|------|------|
| BWPB | 0.29 | 0.40 | 0.22 | 0.14 | 0.69 | 1.60  | 0.01 | 0.33 | 0.35 | 0.38 | 0.18 | 0.31 | 0.61 | 0.31 | 0.19 | 0.35 | 0.00 | 0.00 |
| BWPB | 0.29 | 0.37 | 0.28 | 0.15 | 0.68 | 1.63  | 0.01 | 0.32 | 0.33 | 0.38 | 0.17 | 0.29 | 0.56 | 0.30 | 0.17 | 0.36 | 0.00 | 0.00 |
| BWPB | 0.30 | 0.38 | 0.24 | 0.15 | 0.69 | 1.69  | 0.01 | 0.31 | 0.36 | 0.35 | 0.18 | 0.27 | 0.60 | 0.31 | 0.18 | 0.35 | 0.00 | 0.00 |
| 3MPC | 1.61 | 0.62 | 0.75 | 0.52 | 1.74 | 3.50  | 0.16 | 0.50 | 0.36 | 0.35 | 0.20 | 0.04 | 0.55 | 1.29 | 0.40 | 2.67 | 0.97 | 0.59 |
| 3MPC | 1.54 | 0.58 | 0.77 | 0.53 | 1.70 | 3.78  | 0.15 | 0.49 | 0.38 | 0.35 | 0.18 | 0.04 | 0.53 | 1.34 | 0.40 | 2.92 | 1.02 | 0.58 |
| 3MPC | 1.54 | 0.60 | 0.77 | 0.52 | 1.76 | 3.40  | 0.15 | 0.51 | 0.36 | 0.35 | 0.19 | 0.04 | 0.52 | 1.35 | 0.39 | 2.68 | 0.96 | 0.58 |
| 7MPC | 1.62 | 0.65 | 0.61 | 0.51 | 1.67 | 3.20  | 0.15 | 0.41 | 0.48 | 1.17 | 0.28 | 0.77 | 0.54 | 0.70 | 0.48 | 0.56 | 0.55 | 0.54 |
| 7MPC | 1.53 | 0.64 | 0.64 | 0.51 | 1.76 | 3.14  | 0.13 | 0.38 | 0.42 | 1.02 | 0.25 | 0.72 | 0.50 | 0.72 | 0.48 | 0.54 | 0.54 | 0.54 |
| 7MPC | 1.51 | 0.59 | 0.61 | 0.52 | 1.64 | 3.08  | 0.14 | 0.40 | 0.46 | 1.02 | 0.26 | 0.74 | 0.49 | 0.71 | 0.49 | 0.57 | 0.55 | 0.55 |
| BWPC | 1.37 | 0.56 | 0.57 | 0.49 | 1.47 | 2.72  | 0.15 | 0.23 | 0.16 | 0.32 | 0.20 | 0.31 | 0.26 | 0.40 | 0.36 | 0.94 | 0.00 | 0.00 |
| BWPC | 1.29 | 0.52 | 0.55 | 0.50 | 1.47 | 2.40  | 0.14 | 0.23 | 0.14 | 0.32 | 0.20 | 0.32 | 0.22 | 0.47 | 0.33 | 0.94 | 0.00 | 0.00 |
| BWPC | 1.42 | 0.56 | 0.60 | 0.52 | 1.58 | 2.55  | 0.13 | 0.23 | 0.14 | 0.33 | 0.19 | 0.33 | 0.24 | 0.46 | 0.33 | 0.97 | 0.00 | 0.00 |
| 3MPD | 1.39 | 0.88 | 0.61 | 0.44 | 4.61 | 7.20  | 0.18 | 0.80 | 0.31 | 0.45 | 0.26 | 0.05 | 0.46 | 1.20 | 0.43 | 2.98 | 1.08 | 0.59 |
| 3MPD | 1.46 | 0.81 | 0.57 | 0.45 | 4.59 | 7.34  | 0.18 | 0.80 | 0.28 | 0.43 | 0.25 | 0.05 | 0.42 | 1.31 | 0.42 | 3.24 | 1.09 | 0.60 |
| 3MPD | 1.44 | 0.87 | 0.58 | 0.45 | 4.69 | 7.36  | 0.18 | 0.77 | 0.29 | 0.44 | 0.24 | 0.05 | 0.42 | 1.34 | 0.42 | 3.29 | 1.09 | 0.58 |
| 7MPD | 1.53 | 0.91 | 0.52 | 0.49 | 5.13 | 7.08  | 0.18 | 0.39 | 0.70 | 1.31 | 0.31 | 0.55 | 0.66 | 2.57 | 1.45 | 1.37 | 0.75 | 0.61 |
| 7MPD | 1.49 | 0.89 | 0.56 | 0.51 | 5.09 | 7.53  | 0.16 | 0.39 | 0.67 | 1.26 | 0.32 | 0.52 | 0.60 | 2.57 | 1.51 | 1.19 | 0.72 | 0.61 |
| 7MPD | 1.48 | 0.91 | 0.56 | 0.50 | 5.07 | 6.79  | 0.19 | 0.40 | 0.69 | 1.24 | 0.30 | 0.52 | 0.63 | 2.40 | 1.47 | 1.33 | 0.70 | 0.61 |
| SWPD | 1.52 | 0.70 | 0.52 | 0.47 | 5.73 | 8.89  | 0.20 | 0.66 | 0.58 | 0.85 | 0.23 | 0.06 | 0.89 | 0.93 | 0.47 | 2.94 | 0.58 | 0.55 |
| SWPD | 1.53 | 0.65 | 0.54 | 0.46 | 5.54 | 9.39  | 0.19 | 0.67 | 0.55 | 0.80 | 0.21 | 0.06 | 0.89 | 0.98 | 0.45 | 2.90 | 0.57 | 0.56 |
| SWPD | 1.52 | 0.63 | 0.54 | 0.47 | 5.69 | 10.20 | 0.19 | 0.68 | 0.53 | 0.81 | 0.22 | 0.06 | 0.86 | 0.98 | 0.43 | 2.71 | 0.58 | 0.55 |
| BWPD | 1.20 | 0.75 | 0.41 | 0.37 | 4.38 | 5.68  | 0.13 | 0.61 | 0.81 | 1.63 | 0.27 | 0.66 | 0.92 | 1.07 | 0.58 | 1.66 | 0.00 | 0.00 |
| BWPD | 1.19 | 0.69 | 0.39 | 0.37 | 4.41 | 5.75  | 0.13 | 0.60 | 0.81 | 1.51 | 0.27 | 0.66 | 0.90 | 1.03 | 0.54 | 1.63 | 0.00 | 0.00 |
| BWPD | 1.20 | 0.69 | 0.40 | 0.36 | 4.42 | 5.37  | 0.14 | 0.60 | 0.82 | 1.47 | 0.27 | 0.66 | 0.91 | 1.00 | 0.54 | 1.52 | 0.00 | 0.00 |
| 3MXA | 0.29 | 1.66 | 0.00 | 0.12 | 0.16 | 14.90 | 0.02 | 0.13 | 0.12 | 0.28 | 0.22 | 0.02 | 0.41 | 0.42 | 0.19 | 0.84 | 0.53 | 0.00 |
| 3MXA | 0.28 | 1.70 | 0.00 | 0.12 | 0.16 | 14.70 | 0.02 | 0.14 | 0.13 | 0.28 | 0.22 | 0.01 | 0.40 | 0.42 | 0.19 | 0.86 | 0.53 | 0.00 |
| 3MXA | 0.28 | 1.71 | 0.00 | 0.13 | 0.17 | 14.60 | 0.02 | 0.13 | 0.12 | 0.27 | 0.22 | 0.01 | 0.40 | 0.43 | 0.18 | 0.87 | 0.52 | 0.00 |
| 7MXA | 0.29 | 1.79 | 0.00 | 0.12 | 0.15 | 15.10 | 0.02 | 0.31 | 0.20 | 0.35 | 0.20 | 0.28 | 0.57 | 0.26 | 0.16 | 0.37 | 0.00 | 0.00 |

|      |      |      |      |      |      |       |      |      |      |      |      |      |      |      |      |      |      |      |
|------|------|------|------|------|------|-------|------|------|------|------|------|------|------|------|------|------|------|------|
| 7MXA | 0.29 | 1.76 | 0.00 | 0.13 | 0.17 | 14.90 | 0.02 | 0.30 | 0.23 | 0.31 | 0.19 | 0.27 | 0.54 | 0.26 | 0.16 | 0.37 | 0.00 | 0.00 |
| 7MXA | 0.28 | 1.70 | 0.00 | 0.12 | 0.18 | 15.30 | 0.02 | 0.29 | 0.21 | 0.32 | 0.18 | 0.29 | 0.52 | 0.26 | 0.16 | 0.38 | 0.00 | 0.00 |
| SWXA | 0.26 | 1.66 | 0.00 | 0.13 | 0.16 | 15.90 | 0.01 | 0.15 | 0.12 | 0.30 | 0.25 | 0.02 | 0.45 | 0.46 | 0.19 | 0.86 | 0.53 | 0.00 |
| SWXA | 0.27 | 1.69 | 0.00 | 0.13 | 0.16 | 16.40 | 0.01 | 0.14 | 0.13 | 0.27 | 0.23 | 0.02 | 0.45 | 0.49 | 0.20 | 0.88 | 0.54 | 0.00 |
| SWXA | 0.27 | 1.72 | 0.00 | 0.12 | 0.14 | 16.30 | 0.01 | 0.15 | 0.12 | 0.28 | 0.21 | 0.02 | 0.44 | 0.47 | 0.19 | 0.88 | 0.54 | 0.00 |
| BWXA | 0.26 | 1.45 | 0.00 | 0.11 | 0.10 | 19.60 | 0.00 | 0.32 | 0.24 | 0.33 | 0.19 | 0.27 | 0.59 | 0.27 | 0.17 | 0.38 | 0.00 | 0.00 |
| BWXA | 0.26 | 1.42 | 0.00 | 0.12 | 0.12 | 19.90 | 0.00 | 0.32 | 0.21 | 0.31 | 0.19 | 0.28 | 0.59 | 0.27 | 0.17 | 0.36 | 0.00 | 0.00 |
| BWXA | 0.25 | 1.47 | 0.00 | 0.12 | 0.12 | 19.80 | 0.00 | 0.32 | 0.24 | 0.34 | 0.19 | 0.27 | 0.55 | 0.25 | 0.16 | 0.39 | 0.00 | 0.00 |
| 3MXB | 0.73 | 0.73 | 0.12 | 0.26 | 0.37 | 16.30 | 0.13 | 0.38 | 0.14 | 0.36 | 0.14 | 0.07 | 0.26 | 0.40 | 0.20 | 2.15 | 0.00 | 0.00 |
| 3MXB | 0.74 | 0.73 | 0.11 | 0.27 | 0.35 | 15.80 | 0.13 | 0.39 | 0.15 | 0.34 | 0.14 | 0.08 | 0.22 | 0.40 | 0.19 | 2.34 | 0.00 | 0.00 |
| 3MXB | 0.73 | 0.71 | 0.09 | 0.27 | 0.35 | 16.10 | 0.12 | 0.40 | 0.15 | 0.34 | 0.14 | 0.07 | 0.22 | 0.36 | 0.19 | 2.26 | 0.00 | 0.00 |
| 7MXB | 0.79 | 0.85 | 0.11 | 0.30 | 0.41 | 16.40 | 0.18 | 0.25 | 0.17 | 0.35 | 0.22 | 0.35 | 0.33 | 0.37 | 0.30 | 1.00 | 0.00 | 0.00 |
| 7MXB | 0.78 | 0.89 | 0.11 | 0.31 | 0.44 | 16.40 | 0.15 | 0.26 | 0.17 | 0.32 | 0.21 | 0.34 | 0.32 | 0.40 | 0.31 | 1.05 | 0.00 | 0.00 |
| 7MXB | 0.76 | 0.86 | 0.11 | 0.31 | 0.42 | 16.30 | 0.16 | 0.27 | 0.16 | 0.32 | 0.20 | 0.34 | 0.26 | 0.40 | 0.27 | 1.11 | 0.00 | 0.00 |
| SWXB | 0.76 | 0.81 | 0.22 | 0.31 | 0.45 | 18.50 | 0.11 | 0.51 | 0.17 | 0.33 | 0.20 | 0.09 | 0.41 | 0.35 | 0.20 | 2.45 | 0.00 | 0.00 |
| SWXB | 0.77 | 0.79 | 0.26 | 0.31 | 0.42 | 18.50 | 0.11 | 0.50 | 0.16 | 0.32 | 0.18 | 0.09 | 0.41 | 0.35 | 0.18 | 2.66 | 0.00 | 0.00 |
| SWXB | 0.77 | 0.78 | 0.26 | 0.31 | 0.47 | 18.50 | 0.11 | 0.50 | 0.16 | 0.31 | 0.17 | 0.09 | 0.38 | 0.36 | 0.18 | 2.60 | 0.00 | 0.00 |
| BWXB | 0.48 | 0.63 | 0.05 | 0.21 | 0.21 | 9.59  | 0.08 | 0.30 | 0.20 | 0.31 | 0.25 | 0.36 | 0.41 | 0.45 | 0.30 | 1.04 | 0.00 | 0.00 |
| BWXB | 0.48 | 0.64 | 0.06 | 0.22 | 0.22 | 9.86  | 0.08 | 0.28 | 0.18 | 0.30 | 0.24 | 0.38 | 0.37 | 0.45 | 0.30 | 1.01 | 0.00 | 0.00 |
| BWXB | 0.47 | 0.56 | 0.06 | 0.21 | 0.20 | 9.57  | 0.08 | 0.28 | 0.18 | 0.30 | 0.23 | 0.36 | 0.37 | 0.44 | 0.28 | 1.06 | 0.00 | 0.00 |
| 3MXC | 0.59 | 1.04 | 0.14 | 0.20 | 1.41 | 18.60 | 0.19 | 0.80 | 0.52 | 0.80 | 0.20 | 0.06 | 0.94 | 0.81 | 0.32 | 2.87 | 0.56 | 0.00 |
| 3MXC | 0.59 | 1.04 | 0.13 | 0.21 | 1.40 | 19.10 | 0.18 | 0.79 | 0.54 | 0.73 | 0.21 | 0.06 | 0.91 | 0.82 | 0.29 | 2.65 | 0.56 | 0.00 |
| 3MXC | 0.59 | 1.02 | 0.14 | 0.21 | 1.59 | 19.80 | 0.16 | 0.79 | 0.53 | 0.74 | 0.21 | 0.06 | 0.88 | 0.87 | 0.28 | 2.81 | 0.55 | 0.00 |
| 7MXC | 0.58 | 1.18 | 0.17 | 0.21 | 1.34 | 16.70 | 0.26 | 0.50 | 0.43 | 0.91 | 0.27 | 0.79 | 0.56 | 0.50 | 0.25 | 0.58 | 0.00 | 0.00 |
| 7MXC | 0.59 | 1.16 | 0.17 | 0.21 | 1.20 | 17.40 | 0.23 | 0.51 | 0.44 | 1.01 | 0.27 | 0.81 | 0.60 | 0.50 | 0.26 | 0.69 | 0.00 | 0.00 |
| 7MXC | 0.59 | 1.16 | 0.17 | 0.20 | 1.23 | 20.20 | 0.22 | 0.50 | 0.42 | 0.92 | 0.28 | 0.82 | 0.59 | 0.51 | 0.25 | 0.65 | 0.00 | 0.00 |
| SWXC | 0.54 | 1.08 | 0.12 | 0.20 | 1.37 | 17.90 | 0.20 | 0.89 | 0.53 | 0.82 | 0.24 | 0.08 | 1.10 | 0.65 | 0.22 | 2.74 | 0.00 | 0.00 |
| SWXC | 0.54 | 1.12 | 0.12 | 0.21 | 1.36 | 17.30 | 0.19 | 0.91 | 0.52 | 0.77 | 0.24 | 0.07 | 1.07 | 0.65 | 0.22 | 2.59 | 0.00 | 0.00 |

|      |      |      |      |      |      |       |      |      |      |      |      |      |      |      |      |      |      |      |
|------|------|------|------|------|------|-------|------|------|------|------|------|------|------|------|------|------|------|------|
| SWXC | 0.54 | 1.11 | 0.12 | 0.20 | 1.32 | 17.60 | 0.18 | 0.90 | 0.52 | 0.75 | 0.23 | 0.07 | 0.98 | 0.62 | 0.23 | 2.77 | 0.00 | 0.00 |
| BWXC | 0.50 | 0.72 | 0.18 | 0.16 | 0.36 | 17.90 | 0.16 | 0.53 | 0.48 | 1.12 | 0.31 | 0.90 | 0.63 | 0.56 | 0.30 | 0.59 | 0.00 | 0.00 |
| BWXC | 0.49 | 0.76 | 0.22 | 0.17 | 0.36 | 18.80 | 0.16 | 0.52 | 0.49 | 1.03 | 0.31 | 0.82 | 0.63 | 0.59 | 0.29 | 0.65 | 0.00 | 0.00 |
| BWXC | 0.49 | 0.68 | 0.18 | 0.18 | 0.35 | 18.60 | 0.16 | 0.52 | 0.44 | 0.96 | 0.29 | 0.85 | 0.59 | 0.53 | 0.26 | 0.59 | 0.00 | 0.00 |
| 3MXD | 0.65 | 1.22 | 0.29 | 0.22 | 0.61 | 12.00 | 0.31 | 1.05 | 0.39 | 0.73 | 0.33 | 0.06 | 0.85 | 0.64 | 0.21 | 2.56 | 0.55 | 0.00 |
| 3MXD | 0.65 | 1.20 | 0.30 | 0.22 | 0.63 | 11.50 | 0.30 | 1.02 | 0.38 | 0.65 | 0.32 | 0.07 | 0.83 | 0.65 | 0.21 | 2.42 | 0.54 | 0.00 |
| 3MXD | 0.65 | 1.14 | 0.21 | 0.23 | 0.61 | 12.20 | 0.29 | 1.05 | 0.38 | 0.68 | 0.30 | 0.06 | 0.75 | 0.63 | 0.21 | 2.37 | 0.55 | 0.00 |
| 7MXD | 0.67 | 1.21 | 0.26 | 0.22 | 0.58 | 12.20 | 0.32 | 0.60 | 0.75 | 1.41 | 0.41 | 0.67 | 0.95 | 0.98 | 0.54 | 1.50 | 0.00 | 0.00 |
| 7MXD | 0.65 | 1.22 | 0.24 | 0.22 | 0.58 | 12.50 | 0.31 | 0.62 | 0.76 | 1.44 | 0.36 | 0.67 | 0.92 | 0.96 | 0.52 | 1.42 | 0.00 | 0.00 |
| 7MXD | 0.64 | 1.20 | 0.24 | 0.22 | 0.58 | 12.00 | 0.31 | 0.61 | 0.79 | 1.41 | 0.37 | 0.66 | 0.91 | 0.97 | 0.51 | 1.47 | 0.00 | 0.00 |
| SWXD | 0.65 | 1.20 | 0.13 | 0.22 | 0.71 | 12.80 | 0.27 | 1.08 | 0.37 | 0.69 | 0.32 | 0.06 | 0.80 | 0.67 | 0.24 | 2.26 | 0.56 | 0.00 |
| SWXD | 0.66 | 1.18 | 0.13 | 0.23 | 0.69 | 12.60 | 0.27 | 1.18 | 0.39 | 0.70 | 0.32 | 0.06 | 0.78 | 0.71 | 0.24 | 2.50 | 0.55 | 0.00 |
| SWXD | 0.66 | 1.18 | 0.13 | 0.21 | 0.69 | 13.00 | 0.28 | 1.18 | 0.37 | 0.68 | 0.32 | 0.06 | 0.80 | 0.70 | 0.21 | 2.76 | 0.54 | 0.00 |
| BWXD | 0.59 | 0.91 | 0.16 | 0.20 | 0.51 | 12.90 | 0.30 | 0.59 | 0.78 | 1.47 | 0.40 | 0.68 | 0.99 | 0.80 | 0.38 | 1.41 | 0.00 | 0.00 |
| BWXD | 0.58 | 0.91 | 0.13 | 0.20 | 0.51 | 13.50 | 0.27 | 0.63 | 0.77 | 1.40 | 0.37 | 0.66 | 0.95 | 0.78 | 0.39 | 1.57 | 0.00 | 0.00 |
| BWXD | 0.57 | 0.91 | 0.14 | 0.20 | 0.49 | 13.90 | 0.28 | 0.65 | 0.78 | 1.35 | 0.37 | 0.71 | 0.99 | 0.78 | 0.40 | 1.63 | 0.00 | 0.00 |
